# Supplementary material for: Aromatic Amino Acids-Guanidinium Complexes through Cation-π Interactions
Source: MDPI journal article supplement (doi:10.3390/molecules20059214), 2015-05-20
Supplement: s1 [file s1]

## Supporting Information

**Figure S1.** Molecular graph (AIM) for all the complexes in PCM-Water.

**Figure S2.** Exponential relationship between the interatomic distances ( $\text{\AA}$ ) and the electron density at the BCPs for the HB interactions.

**Figure S3.** Exponential relationship between the interatomic distances ( $\text{\AA}$ ) and the Laplacian of the electron density at the BCPs for the cation- $\pi$  interactions.

**Figure S4.** Exponential correlation found between the interaction energies,  $E_i$  ( $\text{kJ}\cdot\text{mol}^{-1}$ ) and NBO second order perturbation energy  $E(2)$  ( $\text{kJ}\cdot\text{mol}^{-1}$ ).

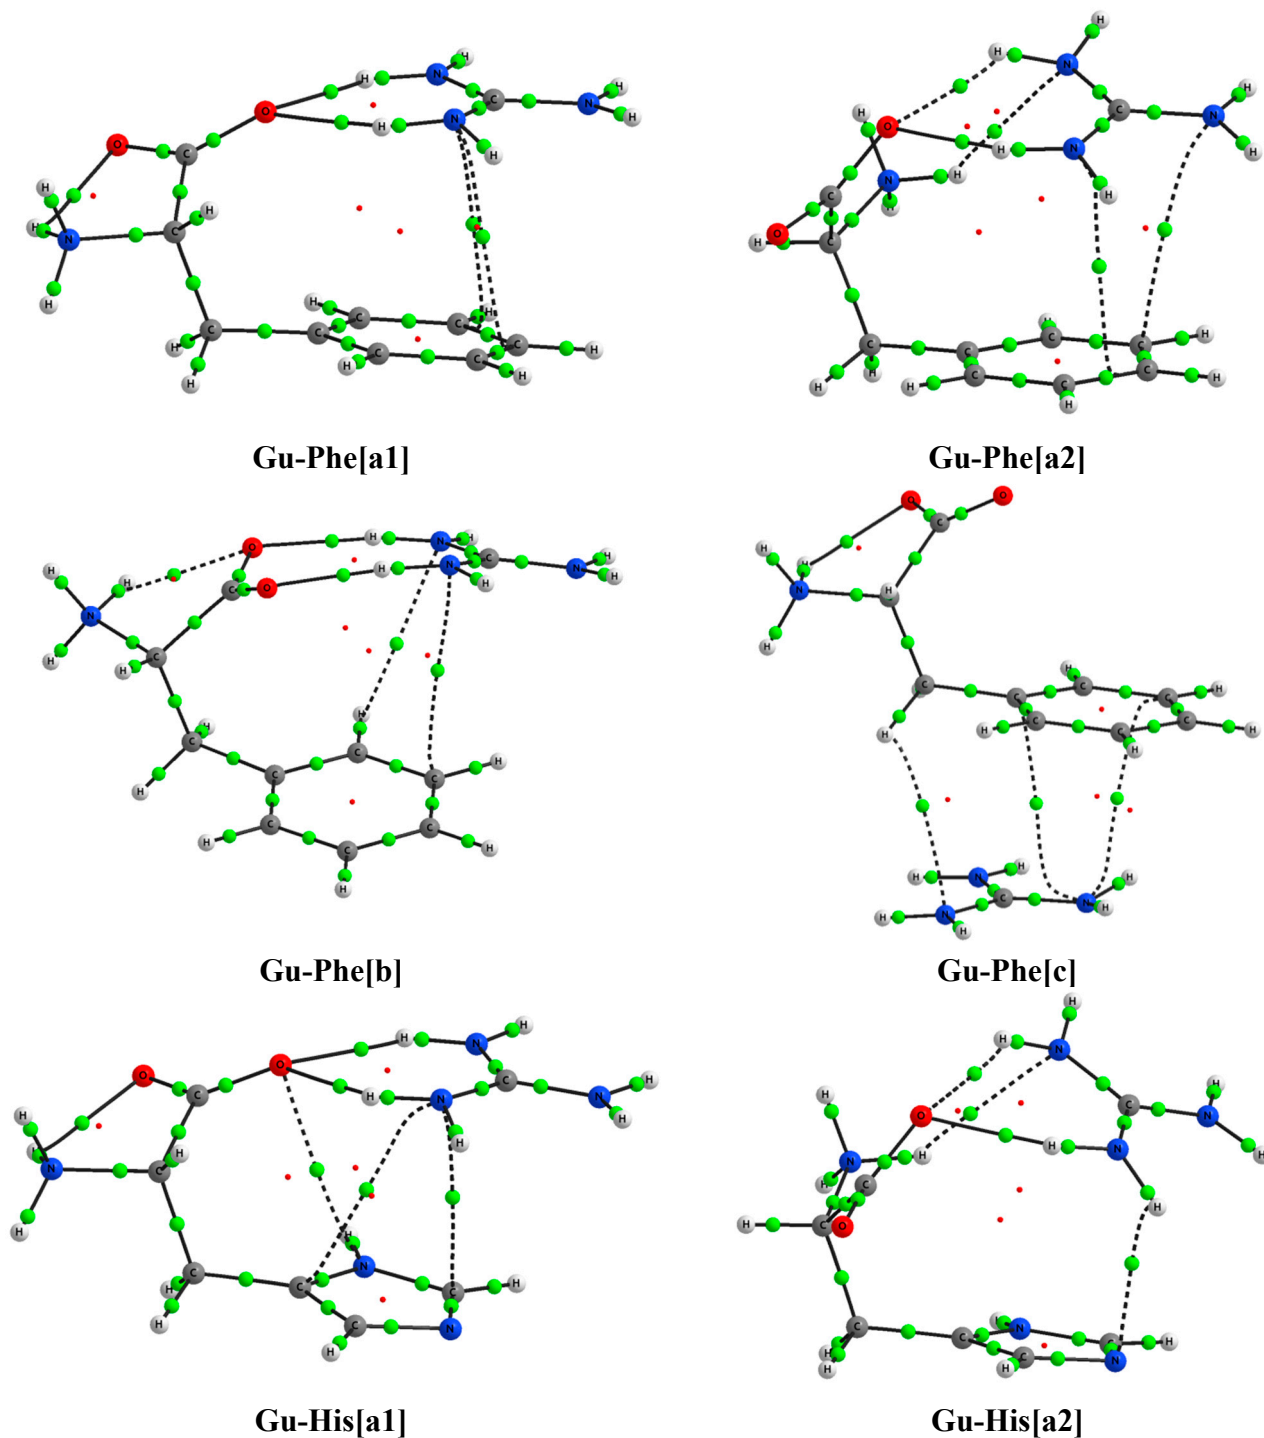

**Figure S1.** *Cont.*

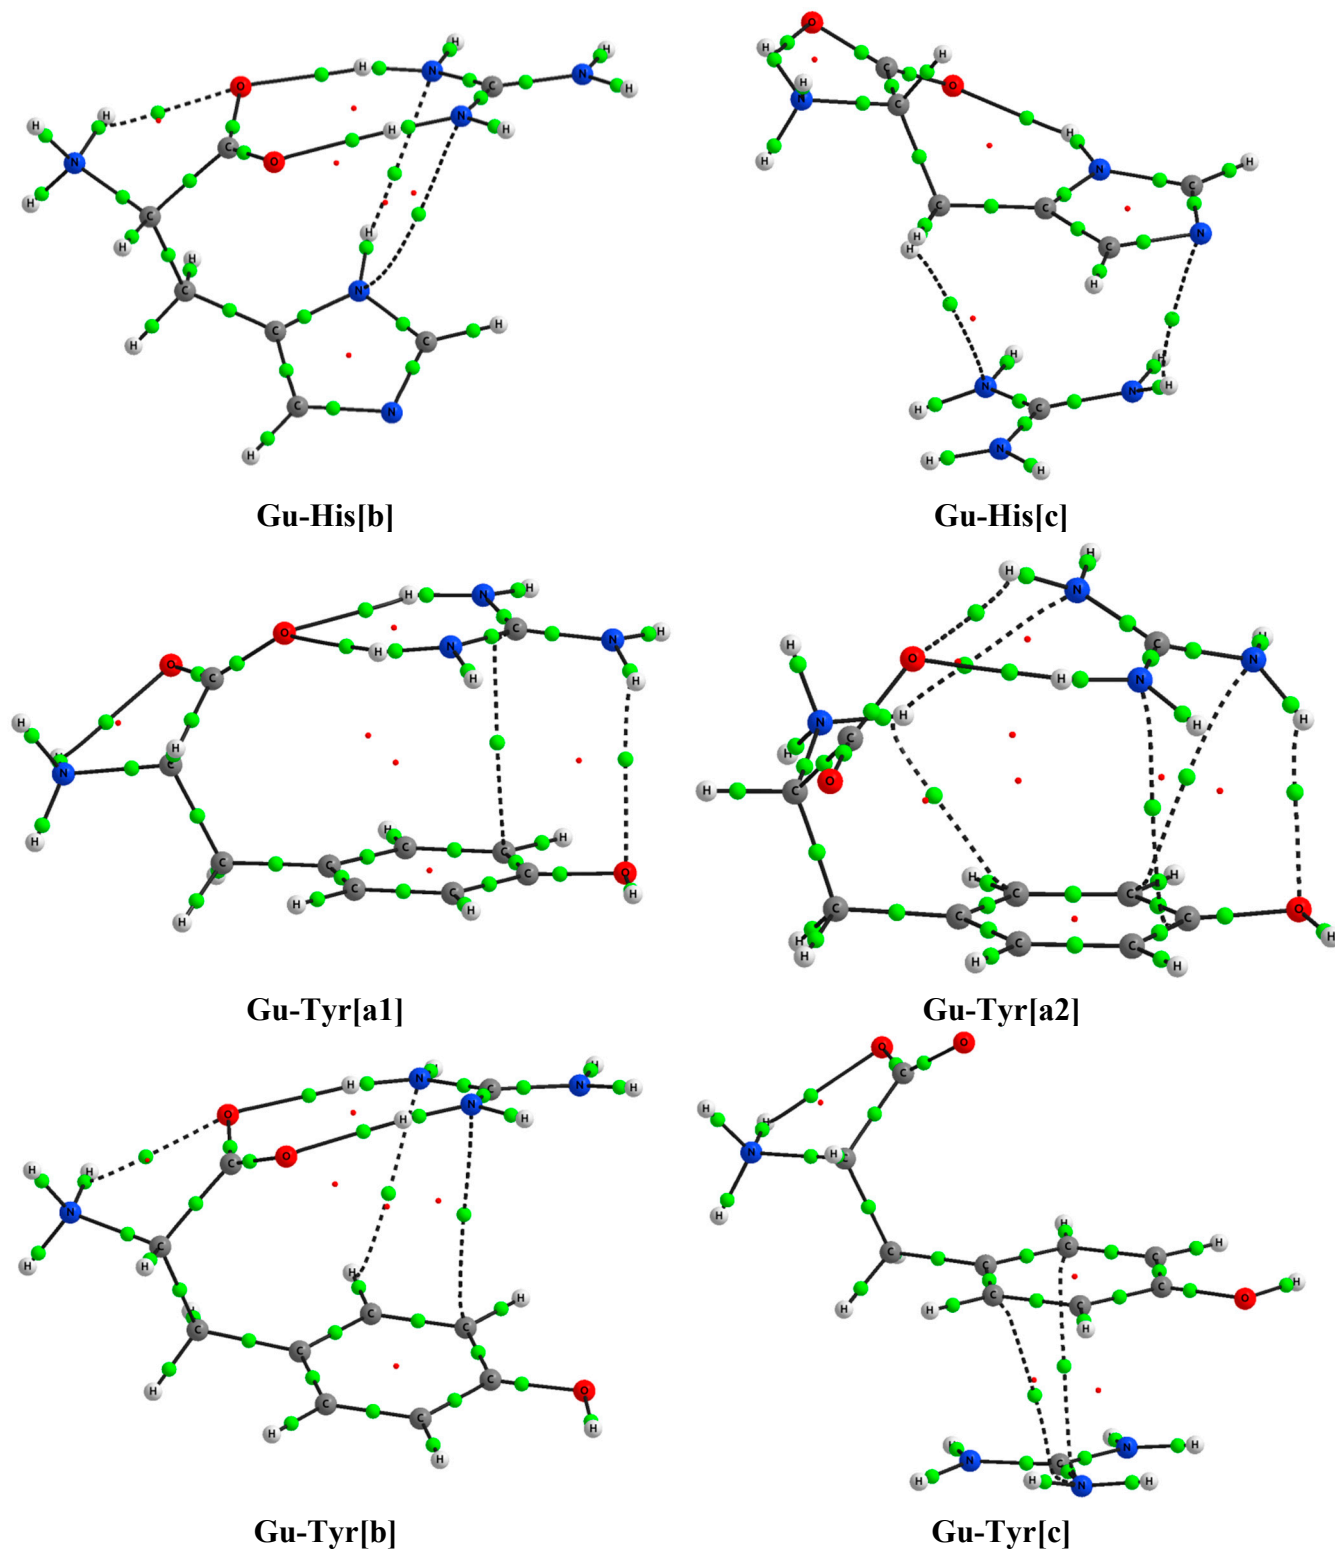

**Figure S1.** Molecular graph (AIM) of the complexes calculated at the M06-2X/6-311++G(d,p) computational level in PCM-water phase. Green and red balls indicate bond and ring critical points, respectively.

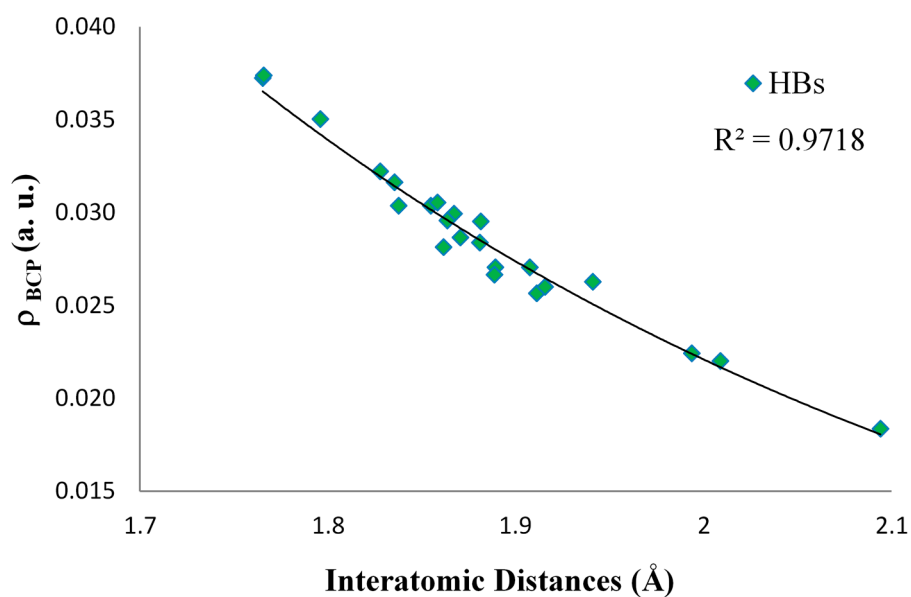

**Figure S2.** Exponential relationship found between the interatomic distances (Å) and the value of the electron density at the BCPs for the HB interactions.

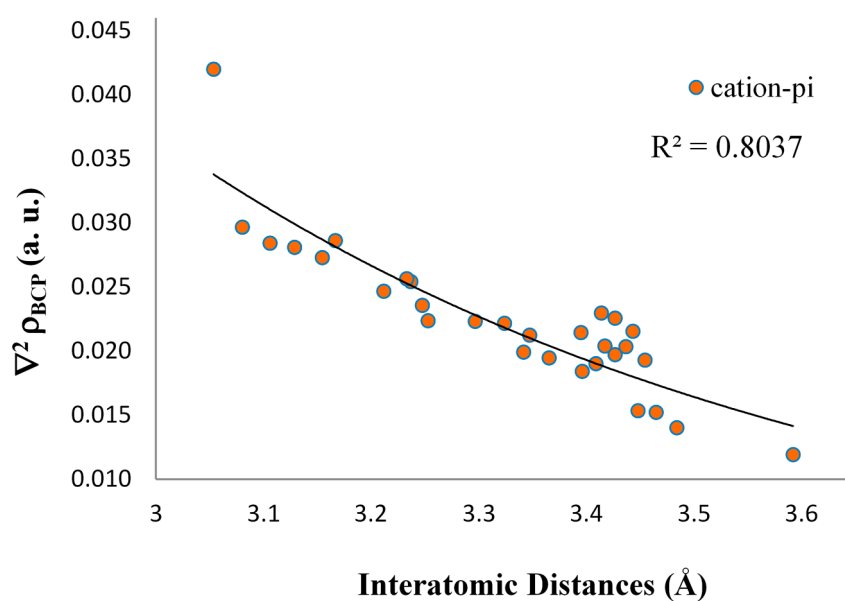

**Figure S3.** Exponential relationship found between the interatomic distances (Å) and the value of the Laplacian of the electron density at the BCPs for the cation- $\pi$  interactions.

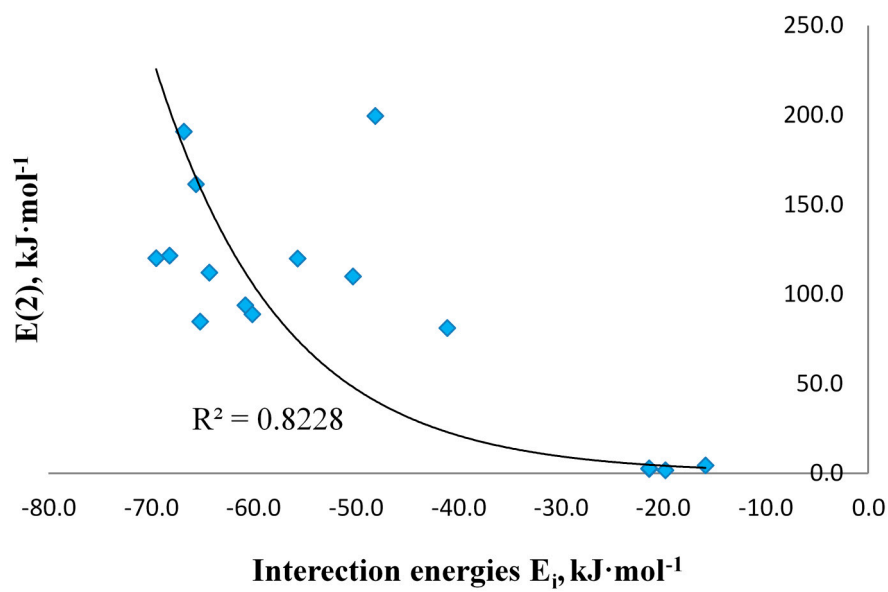

**Figure S4.** Exponential correlation found between the interaction energies,  $E_i$  ( $\text{kJ}\cdot\text{mol}^{-1}$ ) and NBO second order perturbation energy  $E(2)$  ( $\text{kJ}\cdot\text{mol}^{-1}$ ).
